# Supplementary material
Source: ML conference proceedings conference paper supplement (https://proceedings.mlr.press/v108/hayashi20a.html)
Supplement: Supplementary file [file hayashi20a-supp.pdf]

## Supplementary Material

### A Proof of Section 3

#### A.1 Proof of Corollary 3.4

*Proof.* Firstly, we derive an error of  $\tilde{\mu}_{\mathbf{x}^*}$  when the observed data follow the regression model (5). Namely, we show the following equality with probability at least  $1 - \delta$ ,

$$\tilde{\mu}_{\mathbf{x}^*} = \mu_{\mathbf{x}^*} + O\left(n^{-1/2}R\right) \pm O\left(\sqrt{\epsilon}L^2R\right),$$

with the model. This equality is an analogous of the inequality (15) without the assumption of the regression model (5).

We start with (14) and obtain

$$\tilde{\mu}_{\mathbf{x}^*} = \frac{\langle \mathbf{v}^*, \mathbf{y} \rangle}{n} + \frac{\langle \mathbf{v} - \mathbf{v}^*, \mathbf{y} \rangle}{n} + \langle \mathbf{v}, \pi(y_S) - y \rangle. \quad (8)$$

By the model (5), we have  $\mathbf{y} = \mathbf{f} + \boldsymbol{\xi}$  where  $\mathbf{f} := (f(\mathbf{x}_1), \dots, f(\mathbf{x}_n))^\top$  and  $\boldsymbol{\xi} := (\xi_1, \dots, \xi_n)^\top$ , then we obtain

$$\langle \mathbf{v} - \mathbf{v}^*, \mathbf{y} \rangle = \langle \mathbf{v} - \mathbf{v}^*, \mathbf{f} \rangle + \langle \mathbf{v} - \mathbf{v}^*, \boldsymbol{\xi} \rangle = \langle \Phi(\mathbf{v} - \mathbf{v}^*), \boldsymbol{\alpha} \rangle_{\mathcal{H}} + \sum_{i \in [n]} \xi_i (v_i - v_i^*).$$

About the second term  $\sum_{i \in [n]} \xi_i (v_i - v_i^*)$ , we define  $\bar{v}_i := (v_i - v_i^*)$ , then we have

$$\sum_{i \in [n]} \xi_i (v_i - v_i^*) \sim \mathcal{N}\left(0, \nu^2 \|\bar{\mathbf{v}}\|_2^2\right),$$

since  $\xi_i \sim \mathcal{N}(0, \nu^2)$  independently and identically. Then, we apply the tail bound for Gaussian random variables and obtain

$$\left| \sum_{i \in [n]} \xi_i (v_i - v_i^*) \right| \leq \sqrt{2\nu} \|\bar{\mathbf{v}}\|_2 \log^{1/2}(1/\delta),$$

with probability at least  $1 - \delta$  for any  $\delta \in (0, 1)$ . By definition of  $\mathbf{v}$ , it has the same  $\ell_\infty$  norm of  $\mathbf{v}^*$ , meaning  $\|\bar{\mathbf{v}}\|_\infty \leq 2R$ . Since  $\|\mathbf{u}\|_2 \leq \sqrt{n}\|\mathbf{u}\|_\infty$  for any  $\mathbf{u} \in \mathbb{R}^n$ , we have  $\|\bar{\mathbf{v}}\|_2 \leq \sqrt{4n}R$ , and

$$\left| \sum_{i \in [n]} \xi_i (v_i - v_i^*) \right| \leq \sqrt{8n\nu}R \log^{1/2}(1/\delta).$$

Substituting the result into (8), and the Cauchy-Schwartz inequality with Lemma 2.3 as (15) yields

$$\begin{aligned} \tilde{\mu}_{\mathbf{x}^*} &= \mu_{\mathbf{x}^*} \pm O\left(\frac{\sqrt{8\nu}R \log^{1/2}(1/\delta)}{\sqrt{n}}\right) \pm O\left(\frac{\|\Phi(\mathbf{v}^* - \mathbf{v})\|_{\mathcal{H}} \|\boldsymbol{\alpha}\|_{\mathcal{H}}}{n} + \|\mathbf{v}\|_\infty \|(\pi(y_S) - y) \mathbf{1}^\top\|_\square \| \mathbf{1} \|_\infty\right) \\ &= \mu_{\mathbf{x}^*} \pm O\left(\frac{\sqrt{8\nu}R \log^{1/2}(1/\delta)}{\sqrt{n}}\right) \pm O\left(\sqrt{\epsilon}L^2R\right). \end{aligned}$$

Substituting  $\delta = 0.01$ , then we obtain

$$\tilde{\mu}_{\mathbf{x}^*} = \mu_{\mathbf{x}^*} + O\left(n^{-1/2}R\right) \pm O\left(\sqrt{\epsilon}L^2R\right).$$

When we substitute  $\epsilon = O(\log^{1/2}n)$ , the second term  $O(n^{-1/2}R)$  is negligible asymptotically in comparison with  $O(\sqrt{\epsilon}L^2R)$ , hence we can ignore the second term as  $n \rightarrow \infty$ .  $\square$

## B Minimizing the Normalized Loss

In this section, we prove Theorem 3.1.

To show that  $\min_{\mathbf{v}} \ell_{K, \mathbf{k}, \lambda}(\mathbf{v})$  and  $\min_{\tilde{\mathbf{v}}} \ell_{K_{SS}, \mathbf{k}_S, \lambda}(\tilde{\mathbf{v}})$  are close, we want to say that  $K$  and  $K_{SS}$  are close in some sense. Here, we measure their distance by the cut norm of their corresponding graphons  $\mathcal{K}$  and  $\mathcal{K}_{SS}$  in order to exploit Lemma 2.2. In the case of  $\mathbf{k}$  and  $\mathbf{k}_S$ , we measure their distance by the cut norm of the graphons  $\mathbf{k}1^\top$  and  $\mathbf{k}_S1^\top$ , where  $1: [0, 1] \rightarrow \mathbb{R}$  is a function with  $1(x) = 1$ .

As we work on graphons, it is useful to define an analog of (2) for graphons:

$$\ell_{\mathcal{K}, \mathbf{k}, \lambda}(f) = \|\mathcal{K}f - \mathbf{k}\|_2^2 + \lambda \langle f, \mathcal{K}f \rangle.$$

We show that the minima of  $\ell_{K, \mathbf{k}, \lambda}$  and  $\ell_{K_{SS}, \mathbf{k}_S, \lambda}$  are close if  $\mathcal{K}$  and  $\mathcal{K}_{SS}$  are close in the cut norm up to a measure-preserving bijection and so do  $\mathbf{k}1^\top$  and  $\mathbf{k}_S1^\top$ .

**Lemma B.1.** *If a set  $S \subseteq [n]$  satisfies*

$$\|\mathcal{K} - \pi(\mathcal{K}_{SS})\|_{\square} \leq \epsilon L \text{ and } \|\mathbf{k}1^\top - \pi(\mathbf{k}_S)1^\top\|_{\square} \leq \epsilon L$$

for some measure-preserving bijection  $\pi: [0, 1] \rightarrow [0, 1]$ , then we have

$$\min_{\tilde{\mathbf{v}} \in \mathbb{R}^s} \ell_{K_{SS}, \mathbf{k}_S, \lambda}(\tilde{\mathbf{v}}) = \min_{\mathbf{v} \in \mathbb{R}^n} \ell_{K, \mathbf{k}, \lambda}(\mathbf{v}) \pm O(\epsilon L^2 R^2).$$

*Proof of Theorem 3.1.* By applying Lemma 2.2 on  $K$  and  $\mathbf{k}1^\top$ , we obtain

$$\|\mathcal{K} - \pi(\mathcal{K}_{SS})\|_{\square} \leq \epsilon L \text{ and } \|(\mathbf{k} - \pi(\mathbf{k}_S))1^\top\|_{\square} \leq \epsilon L$$

for a measure-preserving bijection  $\pi: [0, 1] \rightarrow [0, 1]$  with probability at least 0.99. Then, the theorem follows by Lemma B.1.  $\square$

### B.1 Proof of Lemma B.1

We say that a function  $f: [0, 1] \rightarrow \mathbb{R}$  is *n-block constant* if  $f(x) = f(x')$  holds whenever  $i_n(x) = i_n(x')$ . For an *n-block constant*  $f$ , we can find  $\mathbf{v} \in \mathbb{R}^n$  such that  $\ell_{K, \mathbf{k}, \lambda}(\mathbf{v}) = \ell_{\mathcal{K}, \mathbf{k}, \lambda}(f)$ :

**Lemma B.2.** *Let  $f: [0, 1] \rightarrow \mathbb{R}$  be an n-block constant function and let  $\mathbf{v} \in \mathbb{R}^n$  be a vector so that  $v_j = f^*(x)$  for  $x \in [0, 1]$  with  $i_n(x) = j$  (Note that  $\mathbf{v}$  is uniquely determined). Then, we have*

$$\ell_{K, \mathbf{k}, \lambda}(\mathbf{v}) = \ell_{\mathcal{K}, \mathbf{k}, \lambda}(f).$$

*Proof.* Note that we have

$$\begin{aligned} \ell_{K, \mathbf{k}, \lambda}(\mathbf{v}) &= \frac{1}{n^3} \|K\mathbf{v}\|_2^2 - \frac{2}{n^2} \langle \mathbf{k}, K\mathbf{v} \rangle + \frac{1}{n} \|\mathbf{k}\|_2^2 + \frac{\lambda}{n^2} \langle \mathbf{v}, K\mathbf{v} \rangle, \\ \ell_{\mathcal{K}, \mathbf{k}, \lambda}(f) &= \|\mathcal{K}f\|_2^2 - 2\langle \mathbf{k}, \mathcal{K}f \rangle + \|\mathbf{k}\|_2^2 + \lambda \langle f, \mathcal{K}f \rangle. \end{aligned}$$

We show that each pair of corresponding terms are equal.

For the first pair of terms, we have

$$\begin{aligned} \|\mathcal{K}f\|_2^2 &= \int_0^1 \left( \int_0^1 \mathcal{K}(x, y) f(y) dy \right)^2 dx = \sum_{i \in [n]} \int_{I_i^n} \left( \sum_{j \in [n]} \int_{I_j^n} \mathcal{K}(x, y) f(y) dy \right)^2 dx \\ &= \sum_{i \in [n]} \int_{I_i^n} \left( \sum_{j \in [n]} \int_{I_j^n} K_{ij} v_j dy \right)^2 dx = \sum_{i \in [n]} \int_{I_i^n} \left( \frac{1}{n} \sum_{j \in [n]} K_{ij} v_j \right)^2 dx \\ &= \frac{1}{n^3} \sum_{i \in [n]} \left( \sum_{j \in [n]} K_{ij} v_j \right)^2 = \frac{1}{n^3} \|K\mathbf{v}\|_2^2. \end{aligned}$$

For the second pair of terms, we have

$$\begin{aligned}
 \langle \mathbf{k}, \mathcal{K}f \rangle &= \int_0^1 \mathbf{k}(x) \left( \int_0^1 \mathcal{K}(x, y) f(y) dy \right) dx \\
 &= \sum_{i \in [n]} \int_{I_i^n} \mathbf{k}(x) \left( \sum_{j \in [n]} \int_{I_j^n} \mathcal{K}(x, y) f(y) dy \right) dx = \sum_{i \in [n]} \int_{I_i^n} y_i \left( \sum_{j \in [n]} \int_{I_j^n} K_{ij} v_j dy \right) dx \\
 &= \sum_{i \in [n]} \int_{I_i^n} y_i \left( \frac{1}{n} \sum_{j \in [n]} K_{ij} v_j \right) dx = \frac{1}{n^2} \sum_{i \in [n]} y_i \left( \sum_{j \in [n]} K_{ij} v_j \right) = \frac{1}{n^2} \langle \mathbf{k}, K\mathbf{v} \rangle.
 \end{aligned}$$

For the third pair of terms, we have

$$\|\mathbf{k}\|_2^2 = \int_0^1 \mathbf{k}(x)^2 dx = \sum_{i \in [n]} \int_{I_i^n} \mathbf{k}(x)^2 dx = \sum_{i \in [n]} \int_{I_i^n} y_i^2 dx = \frac{1}{n} \sum_{i \in [n]} y_i^2 = \frac{1}{n} \|\mathbf{k}\|_2^2.$$

For the fourth pair of terms, we have

$$\begin{aligned}
 \langle f, \mathcal{K}f \rangle &= \int_0^1 \int_0^1 \mathcal{K}(x, y) f(x) f(y) dx dy = \sum_{i \in [n]} \sum_{j \in [n]} \int_{I_i^n} \int_{I_j^n} \mathcal{K}(x, y) f(x) f(y) dx dy \\
 &= \frac{1}{n^2} n \sum_{i \in [n]} \sum_{j \in [n]} K_{ij} v_i v_j = \frac{1}{n^2} \langle \mathbf{v}, K\mathbf{v} \rangle.
 \end{aligned}$$

Combining these equalities establishes the claim.  $\square$

The following lemma states that minimizing  $\ell_{K, \mathbf{k}, \lambda}$  and  $\ell_{\mathcal{K}, \mathbf{k}, \lambda}$  are equivalent:

**Lemma B.3.** *For any  $R \in \mathbb{R}_+$ , we have*

$$\min_{\mathbf{v} \in \mathbb{R}^n: \|\mathbf{v}\|_\infty \leq R} \ell_{K, \mathbf{k}, \lambda}(\mathbf{v}) = \min_{f: [0, 1] \rightarrow \mathbb{R}: \|f\|_\infty \leq R} \ell_{\mathcal{K}, \mathbf{k}, \lambda}(f).$$

*Proof.* First, we show (RHS)  $\leq$  (LHS). Let  $\mathbf{v}^*$  be a minimizer of the LHS and let  $f: [0, 1] \rightarrow \mathbb{R}$  with  $f(x) = v_{i_n}^*(x)$ . Note that  $\|f\|_\infty = \|\mathbf{v}^*\|_\infty$ . As  $f$  is  $n$ -block constant, by Lemma B.2, we have  $\ell_{\mathcal{K}, \mathbf{k}, \lambda}(f) = \ell_{K, \mathbf{k}, \lambda}(\mathbf{v}^*)$ .

Next, we show (LHS)  $\leq$  (RHS). First, note that there exists a minimizer of the RHS because  $\ell_{\mathcal{K}, \mathbf{k}, \lambda}$  is convex. Indeed, we can show that there is an  $n$ -block constant minimizer. To this end, let  $f^*: [0, 1] \rightarrow \mathbb{R}$  be an arbitrary minimizer of the RHS. For an integer  $m \in \mathbb{N}$ , let  $f_m: [0, 1] \rightarrow \mathbb{R}$  be the  $(n \cdot m)$ -block constant function, where the value of the  $i$ -th block is the average of the values of  $f^*$  in the corresponding interval. As the sequence  $\{f_m\}_m$  (strongly) converges to  $f^*$  in the  $L^2$  norm,  $\ell_{\mathcal{K}, \mathbf{k}, \lambda}(f_m)$  converges to  $\ell_{\mathcal{K}, \mathbf{k}, \lambda}(f^*)$ .

Next for each  $m \in \mathbb{N}$ , we construct an  $n$ -block constant function  $f'_m: [0, 1] \rightarrow \mathbb{R}$  from  $f_m$ . As  $\ell_{\mathcal{K}, \mathbf{k}, \lambda}$  is convex and is invariant under swapping  $f_m(x)$  and  $f_m(x')$  for any  $x, x' \in [0, 1]$  with  $i_n(x) = i_n(x')$ , we can replace  $f_m(x)$  and  $f_m(x')$  with their average without increasing the value of  $\ell_{\mathcal{K}, \mathbf{k}, \lambda}$ . By taking the limit of this process, we can construct an  $n$ -block constant function  $f'_m$  such that  $\ell_{\mathcal{K}, \mathbf{k}, \lambda}(f'_m) \leq \ell_{\mathcal{K}, \mathbf{k}, \lambda}(f_m)$ .

Then, there is a subsequence of  $\{f'_m\}_m$  in which  $f'_m$  converges to an  $n$ -block constant function,  $f'$ , and we replace  $\{f'_m\}_m$  with this subsequence. Then, we have  $\ell_{\mathcal{K}, \mathbf{k}, \lambda}(f') \leq \lim_{m \rightarrow \infty} \ell_{\mathcal{K}, \mathbf{k}, \lambda}(f'_m) \leq \lim_{m \rightarrow \infty} \ell_{\mathcal{K}, \mathbf{k}, \lambda}(f_m) = \ell_{\mathcal{K}, \mathbf{k}, \lambda}(f^*)$ . Hence, there is a  $n$ -block constant minimizer  $f'$ . Now as  $f'$  is  $n$ -block constant, Lemma B.2 gives a vector  $\mathbf{v} \in \mathbb{R}^n$  such that  $\ell_{K, \mathbf{k}, \lambda}(\mathbf{v}) = \ell_{\mathcal{K}, \mathbf{k}, \lambda}(f')$ . Also,  $\|\mathbf{v}\|_\infty = \|f'\|_\infty$ .  $\square$

*Proof of Lemma B.1.* We have

$$\begin{aligned}
 \min_{\tilde{\mathbf{v}} \in \mathbb{R}^s} \ell_{K_{SS}, \mathbf{k}_S, \lambda}(\tilde{\mathbf{v}}) &= \min_{\tilde{\mathbf{v}} \in \mathbb{R}^s: \|\tilde{\mathbf{v}}\|_\infty \leq R} \ell_{K_{SS}, \mathbf{k}_S, \lambda}(\tilde{\mathbf{v}}) = \min_{f: [0, 1] \rightarrow \mathbb{R}: \|f\|_\infty \leq R} \ell_{\mathcal{K}_{SS}, \mathbf{k}_S, \lambda}(f) && \text{(By Lemma B.3)} \\
 &= \min_{f: [0, 1] \rightarrow \mathbb{R}: \|f\|_\infty \leq R} \|\mathcal{K}_{SS} f\|_2^2 - 2\langle \mathbf{k}_S, \mathcal{K}_{SS} f \rangle + \|\mathbf{k}_S\|_2^2 + \lambda \langle f, \mathcal{K}_{SS} f \rangle
 \end{aligned}$$

$$\begin{aligned}
 &= \min_{\substack{f: [0,1] \rightarrow \mathbb{R}: \\ \|f\|_\infty \leq R}} \|\pi(\mathcal{K}_{SS})f\|_2^2 - 2\langle \pi(\mathbf{k}_S), \pi(\mathcal{K}_{SS})f \rangle + \|\pi(\mathbf{k}_S)\|_2^2 + \lambda \langle f, \pi(\mathcal{K}_{SS})f \rangle \\
 &= \min_{\substack{f: [0,1] \rightarrow \mathbb{R}: \\ \|f\|_\infty \leq R}} \left\| (\pi(\mathcal{K}_{SS}) - \mathcal{K} + \mathcal{K})f \right\|_2^2 - 2\langle \pi(\mathbf{k}_S) - \mathbf{k} + \mathbf{k}, (\pi(\mathcal{K}_{SS}) - \mathcal{K} + \mathcal{K})f \rangle \\
 &\quad + \|\pi(\mathbf{k}_S) - \mathbf{k} + \mathbf{k}\|_2^2 + \lambda \langle f, (\pi(\mathcal{K}_{SS}) - \mathcal{K} + \mathcal{K})f \rangle \\
 &= \min_{\substack{f: [0,1] \rightarrow \mathbb{R}: \\ \|f\|_\infty \leq R}} \|\mathcal{K}f\|_2^2 + 2\langle (\pi(\mathcal{K}_{SS}) - \mathcal{K})f, \mathcal{K}f \rangle + \left\| (\pi(\mathcal{K}_{SS}) - \mathcal{K})f \right\|_2^2 \\
 &\quad - 2\langle \mathbf{k}, \mathcal{K}f \rangle - 2\langle \mathbf{k}, (\pi(\mathcal{K}_{SS}) - \mathcal{K})f \rangle - 2\langle \pi(\mathbf{k}_S) - \mathbf{k}, \mathcal{K}f \rangle \\
 &\quad - 2\langle \pi(\mathbf{k}_S) - \mathbf{k}, (\pi(\mathcal{K}_{SS}) - \mathcal{K})f \rangle + \|\mathbf{k}\|_2^2 + 2\langle \pi(\mathbf{k}_S) - \mathbf{k}, \mathbf{k} \rangle + \|\pi(\mathbf{k}_S) - \mathbf{k}\|_2^2 \\
 &\quad + \lambda \langle f, \mathcal{K}f \rangle + \lambda \langle f, (\pi(\mathcal{K}_{SS}) - \mathcal{K})f \rangle. \tag{9}
 \end{aligned}$$

By Lemma 2.3 and using the fact that  $\pi(\mathbf{k}_S) - \mathbf{k} = (\pi(\mathbf{k}_S) - \mathbf{k})\mathbf{1}^\top \mathbf{1}$ , we have

$$\begin{aligned}
 (9) &= \min_{\substack{f: [0,1] \rightarrow \mathbb{R}: \\ \|f\|_\infty \leq R}} \|\mathcal{K}f\|_2^2 - 2\langle \mathbf{k}, \mathcal{K}f \rangle + \|\mathbf{k}\|_2^2 + \lambda \langle f, \mathcal{K}f \rangle \\
 &\quad \pm \left( 2\|\pi(\mathcal{K}_{SS}) - \mathcal{K}\|_\square \|\mathcal{K}\|_\square \|f\|_\infty + \|\pi(\mathcal{K}_{SS}) - \mathcal{K}\|_\square^2 \|f\|_\infty^2 \right. \\
 &\quad + 2\|\pi(\mathcal{K}_{SS}) - \mathcal{K}\|_\square \|\mathbf{k}\|_\infty \|f\|_\infty + 2\|\mathcal{K}\|_\square \|(\pi(\mathbf{k}_S) - \mathbf{k})\mathbf{1}^\top\|_\square \|\mathbf{1}\|_\infty \|f\|_\infty \\
 &\quad + 2\|\pi(\mathcal{K}_{SS}) - \mathcal{K}\|_\square \|(\pi(\mathbf{k}_S) - \mathbf{k})\mathbf{1}^\top\|_\square \|\mathbf{1}\|_\infty \|f\|_\infty \\
 &\quad \left. + 2\|(\pi(\mathbf{k}_S) - \mathbf{k})\mathbf{1}^\top\|_\square \|\mathbf{1}\|_\infty \|\mathbf{k}\|_\infty + \|\pi(\mathbf{k}_S) - \mathbf{k}\|_2^2 + \lambda \|\pi(\mathcal{K}_{SS}) - \mathcal{K}\|_\square \|f\|_\infty^2 \right). \tag{10}
 \end{aligned}$$

From the assumption, we have

$$\begin{aligned}
 &= \min_{f: [0,1] \rightarrow \mathbb{R}: \|f\|_\infty \leq R} \|\mathcal{K}f\|_2^2 - 2\langle \mathbf{k}, \mathcal{K}f \rangle + \|\mathbf{k}\|_2^2 + \lambda \langle f, \mathcal{K}f \rangle \\
 &\quad \pm \left( 2\epsilon L^2 R^2 + \epsilon^2 L^2 R^2 + 2\epsilon L^2 R + 2\epsilon L^2 R + 2\epsilon^2 L^2 R + 2\epsilon L^2 + \epsilon^2 L^2 + \lambda \epsilon L R^2 \right) \\
 &= \min_{\mathbf{v} \in \mathbb{R}^n: \|\mathbf{v}\|_\infty \leq R} \frac{1}{n^3} \|K\mathbf{v}\|_2^2 - \frac{2}{n^2} \langle \mathbf{k}, K\mathbf{v} \rangle + \frac{1}{n} \|\mathbf{k}\|_2^2 + \frac{\lambda}{n^2} \langle \mathbf{v}, \mathcal{K}\mathbf{v} \rangle \pm O(\epsilon L^2 R^2) \quad (\text{By Lemma B.3}) \\
 &= \min_{\mathbf{v} \in \mathbb{R}^n: \|\mathbf{v}\|_\infty \leq R} \ell_{K, \mathbf{k}, \lambda}(\mathbf{v}) \pm O(\epsilon L^2 R^2) = \min_{\mathbf{v} \in \mathbb{R}^n} \ell_{K, \mathbf{k}, \lambda}(\mathbf{v}) \pm O(\epsilon L^2 R^2)
 \end{aligned}$$

as desired.  $\square$

## C Proof of Theorem 3.2

The following lemma is a modification of Lemma B.1 for relating the solution of  $\ell_{K_{SS}, \mathbf{k}_S, \lambda}$  and that of  $\ell_{K, \mathbf{k}, \lambda}$  using a given measure-preserving bijection.

**Lemma C.1.** *If a set  $S \subseteq [n]$  satisfies*

$$\|\mathcal{K} - \pi(\mathcal{K}_{SS})\|_\square \leq \epsilon L \text{ and } \|\mathbf{k}\mathbf{1}^\top - \pi(\mathbf{k}_S)\mathbf{1}^\top\|_\square \leq \epsilon L$$

for a measure-preserving bijection  $\pi: [0, 1] \rightarrow [0, 1]$ , then for any  $\tilde{\mathbf{v}} \in \mathbb{R}^s$  with  $\|\tilde{\mathbf{v}}\|_\infty \leq R$ , there exists  $\mathbf{v} \in \mathbb{R}^n$  such that

$$\ell_{K_{SS}, \mathbf{k}_S, \lambda}(\tilde{\mathbf{v}}) = \ell_{K, \mathbf{k}, \lambda}(\mathbf{v}) \pm O(\epsilon L^2 R^2) \quad \text{and} \quad \pi(\tilde{\mathbf{v}}) = \mathbf{v}.$$

*Proof.* Let  $\tilde{\nu}: [0, 1] \rightarrow \mathbb{R}$  be the function corresponding to  $\tilde{\mathbf{v}}$ , that is,  $\tilde{\nu}(x) = \tilde{v}_{i_n(x)}$ . Then, we have

$$\ell_{K_{SS}, \mathbf{k}_S, \lambda}(\tilde{\mathbf{v}}) = \frac{1}{s^3} \|K_{SS}\tilde{\mathbf{v}}\|_2^2 - \frac{2}{s^2} \langle \mathbf{k}_S, K_{SS}\tilde{\mathbf{v}} \rangle + \frac{1}{s} \|\mathbf{k}_S\|_2^2 + \frac{\lambda}{n^2} \langle \tilde{\mathbf{v}}, K_{SS}\tilde{\mathbf{v}} \rangle$$

$$\begin{aligned}
 &= \|\mathcal{K}_{SS}\tilde{\mathbf{v}}\|_2^2 - 2\langle \mathbf{k}_S, \mathcal{K}_{SS}\tilde{\mathbf{v}} \rangle + \|\mathbf{k}_S\|_2^2 + \lambda\langle \tilde{\mathbf{v}}, \mathcal{K}_{SS}\tilde{\mathbf{v}} \rangle && \text{(By Lemma B.2)} \\
 &= \|\pi(\mathcal{K}_{SS})\pi(\tilde{\mathbf{v}})\|_2^2 - 2\langle \pi(\mathbf{k}_S), \pi(\mathcal{K}_{SS})\pi(\tilde{\mathbf{v}}) \rangle + \|\pi(\mathbf{k}_S)\|_2^2 + \lambda\langle \pi(\tilde{\mathbf{v}}), \pi(\mathcal{K}_{SS})\pi(\tilde{\mathbf{v}}) \rangle \\
 &= (\pi(\mathcal{K}_{SS}) - \mathcal{K} + \mathcal{K})\pi(\tilde{\mathbf{v}})\|_2^2 - 2\langle \pi(\mathbf{k}_S) - \mathbf{k} + \mathbf{k}, (\pi(\mathcal{K}_{SS}) - \mathcal{K} + \mathcal{K})\pi(\tilde{\mathbf{v}}) \rangle \\
 &\quad + \|\pi(\mathbf{k}_S) - \mathbf{k} + \mathbf{k}\|_2^2 + \lambda\langle \pi(\tilde{\mathbf{v}}), (\pi(\mathcal{K}_{SS}) - \mathcal{K} + \mathcal{K})\pi(\tilde{\mathbf{v}}) \rangle \\
 &= \|\mathcal{K}\pi(\tilde{\mathbf{v}})\|_2^2 + 2\langle (\pi(\mathcal{K}_{SS}) - \mathcal{K})\pi(\tilde{\mathbf{v}}), \mathcal{K}\pi(\tilde{\mathbf{v}}) \rangle + \|(\pi(\mathcal{K}_{SS}) - \mathcal{K})\pi(\tilde{\mathbf{v}})\|_2^2 \\
 &\quad - 2\langle \mathbf{k}, \mathcal{K}\pi(\tilde{\mathbf{v}}) \rangle - 2\langle \mathbf{k}, (\pi(\mathcal{K}_{SS}) - \mathcal{K})\pi(\tilde{\mathbf{v}}) \rangle - 2\langle \pi(\mathbf{k}_S) - \mathbf{k}, \mathcal{K}\pi(\tilde{\mathbf{v}}) \rangle - 2\langle \pi(\mathbf{k}_S) - \mathbf{k}, (\pi(\mathcal{K}_{SS}) - \mathcal{K})\pi(\tilde{\mathbf{v}}) \rangle \\
 &\quad + \|\mathbf{k}\|_2^2 + 2\langle \pi(\mathbf{k}_S) - \mathbf{k}, \mathbf{k} \rangle + \|\pi(\mathbf{k}_S) - \mathbf{k}\|_2^2 \\
 &\quad + \lambda\langle \pi(\tilde{\mathbf{v}}), \mathcal{K}\pi(\tilde{\mathbf{v}}) \rangle + \lambda\langle \pi(\tilde{\mathbf{v}}), (\pi(\mathcal{K}_{SS}) - \mathcal{K})\pi(\tilde{\mathbf{v}}) \rangle. && (11)
 \end{aligned}$$

By Lemma 2.3 and using the assumption that  $\pi(\mathbf{k}_S) - \mathbf{k} = (\pi(\mathbf{k}_S) - \mathbf{k})\mathbf{1}^\top$ , we have

$$\begin{aligned}
 (11) &= \|\mathcal{K}\pi(\tilde{\mathbf{v}})\|_2^2 - 2\langle \mathbf{k}, \mathcal{K}\pi(\tilde{\mathbf{v}}) \rangle + \|\mathbf{k}\|_2^2 + \lambda\langle \pi(\tilde{\mathbf{v}}), \mathcal{K}\pi(\tilde{\mathbf{v}}) \rangle \\
 &\quad \pm \left( 2\|\pi(\mathcal{K}_{SS}) - \mathcal{K}\|_{\square} \|\mathcal{K}\|_{\square} \|\pi(\tilde{\mathbf{v}})\|_{\infty}^2 + \|\pi(\mathcal{K}_{SS}) - \mathcal{K}\|_{\square}^2 \|\pi(\tilde{\mathbf{v}})\|_{\infty}^2 \right. \\
 &\quad + 2\|\pi(\mathcal{K}_{SS}) - \mathcal{K}\|_{\square} \|\mathbf{k}\|_{\infty} \|\pi(\tilde{\mathbf{v}})\|_{\infty} + 2\|\mathcal{K}\|_{\square} \|(\pi(\mathbf{k}_S) - \mathbf{k})\mathbf{1}^\top\|_{\square} \|\mathbf{1}\|_{\infty} \|\pi(\tilde{\mathbf{v}})\|_{\infty} \\
 &\quad + 2\|\pi(\mathcal{K}_{SS}) - \mathcal{K}\|_{\square} \|(\pi(\mathbf{k}_S) - \mathbf{k})\mathbf{1}^\top\|_{\square} \|\mathbf{1}\|_{\infty} \|\pi(\tilde{\mathbf{v}})\|_{\infty} + 2\|(\pi(\mathbf{k}_S) - \mathbf{k})\mathbf{1}^\top\|_{\square} \|\mathbf{1}\|_{\infty} \|\mathbf{k}\|_{\infty} \\
 &\quad \left. + \|\pi(\mathbf{k}_S) - \mathbf{k}\|_2^2 + \lambda\|\pi(\mathcal{K}_{SS}) - \mathcal{K}\|_2 \|\pi(\tilde{\mathbf{v}})\|_2^2 \right). && (12)
 \end{aligned}$$

Recall that  $\pi$  satisfies  $i_n(\pi(x)) = i_n(\pi(y))$  whenever  $i_n(x) = i_n(y)$ . Then,  $\pi(\tilde{\mathbf{v}})$  is  $n$ -block constant, and hence we can define a vector  $\mathbf{v} \in \mathbb{R}^n$  corresponding to  $\pi(\tilde{\mathbf{v}})$ , that is,  $v_i = \pi(\tilde{\mathbf{v}})(x)$  for any  $x \in [0, 1]$  with  $i_n(x)$ . Then, we have

$$\begin{aligned}
 (12) &= \|\mathcal{K}\pi(\tilde{\mathbf{v}})\|_2^2 - 2\langle \mathbf{k}, \mathcal{K}\pi(\tilde{\mathbf{v}}) \rangle + \|\mathbf{k}\|_2^2 + \lambda\langle \pi(\tilde{\mathbf{v}}), \mathcal{K}\pi(\tilde{\mathbf{v}}) \rangle \\
 &\quad \pm \left( 2\epsilon L^2 R^2 + \epsilon^2 L^2 R^2 + 2\epsilon L^2 R + 2\epsilon L^2 R + 2\epsilon^2 L^2 R + 2\epsilon L^2 + \epsilon^2 L^2 + \lambda\epsilon L R^2 \right) \\
 &= \frac{1}{n^3} \|K\mathbf{v}\|_2^2 - \frac{2}{n^2} \langle \mathbf{k}, K\mathbf{v} \rangle + \frac{1}{n} \|\mathbf{k}\|_2^2 + \frac{\lambda}{n^2} \langle \mathbf{v}, \mathcal{K}\mathbf{v} \rangle \pm O(\epsilon L^2 R^2) && \text{(By Lemma B.3)} \\
 &= \ell_{K, \mathbf{k}, \lambda}(\mathbf{v}) \pm O(\epsilon L^2 R^2)
 \end{aligned}$$

as desired.  $\square$

The following lemma states that, if  $\mathbf{v} + \Delta$  and  $\mathbf{v}$  have similar normalized losses, then  $\Phi(\Delta)$  must be small in  $\mathcal{H}$ -norm.

**Lemma C.2.** *For any vectors  $\mathbf{v}$ , and  $\Delta \in \mathbb{R}^n$ , we have*

$$\|\Phi(\Delta)\|_{\mathcal{H}} = O\left(n\sqrt{\frac{\ell_{K, \mathbf{k}, \lambda}(\mathbf{v} + \Delta) - \ell_{K, \mathbf{k}, \lambda}(\mathbf{v})}{\lambda}}\right).$$

*Proof.* Recall that

$$\ell_{K, \mathbf{k}, \lambda}(\mathbf{v}) = \frac{1}{n^3} \|K\mathbf{v}\|_2^2 - \frac{2}{n^2} \langle \mathbf{k}, K\mathbf{v} \rangle + \frac{1}{n} \|\mathbf{k}\|_2^2 + \frac{\lambda}{n^2} \langle \mathbf{v}, K\mathbf{v} \rangle.$$

Then, we have

$$\begin{aligned}
 &\ell_{K, \mathbf{k}, \lambda}(\mathbf{v} + \Delta) - \ell_{K, \mathbf{k}, \lambda}(\mathbf{v}) \\
 &= \frac{1}{n^3} \|K(\mathbf{v} + \Delta)\|_2^2 - \frac{1}{n^3} \|K\mathbf{v}\|_2^2 - \frac{2}{n^2} \langle \mathbf{k}, K(\mathbf{v} + \Delta) \rangle + \frac{2}{n^2} \langle \mathbf{k}, K\mathbf{v} \rangle \\
 &\quad + \frac{\lambda}{n^2} \langle (\mathbf{v} + \Delta), K(\mathbf{v} + \Delta) \rangle - \frac{\lambda}{n^2} \langle \mathbf{v}, K\mathbf{v} \rangle \\
 &= \frac{1}{n^3} \left( 2\langle K\mathbf{v}, K\Delta \rangle + \|K\Delta\|_2^2 \right) - \frac{2}{n^2} \langle \mathbf{k}, K\Delta \rangle + \frac{\lambda}{n^2} \left( 2\langle \Delta, K(\mathbf{v} + \Delta) \rangle + \langle \Delta, K\Delta \rangle \right) \\
 &= \frac{1}{n^3} \left( 2\langle K\mathbf{v}, K\Delta \rangle + \|K\Delta\|_2^2 \right) - \frac{2}{n^2} \langle \mathbf{k}, K\Delta \rangle + \frac{\lambda}{n^2} \left( 2\langle \mathbf{v}, K\Delta \rangle + 3\langle \Delta, K\Delta \rangle \right). && (13)
 \end{aligned}$$

Let  $\lambda_1 \leq Ln$  be the largest eigenvalue of  $K$ . Let  $U\Sigma V^\top$  be the SVD of  $\Phi$ , where  $U \in \mathbb{R}^{p \times p}$ ,  $\Sigma = \text{diag}(\sigma_1, \dots, \sigma_p)$  for  $\sigma_1 \geq \dots \geq \sigma_p$ , and  $V: \mathcal{H} \rightarrow \mathbb{R}^p$ . As  $K_{ij} = \langle \phi_{\mathbf{x}_i}, \phi_{\mathbf{x}_j} \rangle_{\mathcal{H}}$ , we have  $K = U\Sigma^2 U^\top$  and hence  $\sigma_1 = \lambda_1^{1/2}$ . By Cauchy-Schwarz, we have

$$\begin{aligned}
 (13) &\geq -\frac{2}{n^3} \|\Phi(K\mathbf{v})\|_{\mathcal{H}} \|\Phi(\Delta)\|_{\mathcal{H}} - \frac{2}{n^2} \|\Phi(\mathbf{k})\|_{\mathcal{H}} \|\Phi(\Delta)\|_{\mathcal{H}} + \frac{\lambda}{n^2} \left( 3\|\Phi(\Delta)\|_{\mathcal{H}}^2 - 2\|\Phi(\mathbf{v})\|_{\mathcal{H}} \|\Phi(\Delta)\|_{\mathcal{H}} \right) \\
 &\geq -\frac{2}{n^{5/2}} \lambda_{\max}^{3/2} R \|\Phi(\Delta)\|_{\mathcal{H}} - \frac{2\lambda_{\max}^{1/2} L}{n^{3/2}} \|\Phi(\Delta)\|_{\mathcal{H}} + \frac{\lambda}{n^2} \left( 3\|\Phi(\Delta)\|_{\mathcal{H}}^2 - 2\lambda_{\max}^{1/2} R n^{1/2} \|\Phi(\Delta)\|_{\mathcal{H}} \right) \\
 &\geq \frac{3\lambda}{n^2} \|\Phi(\Delta)\|_{\mathcal{H}}^2 - \frac{2(L^{3/2}R + L^{3/2} + \lambda L^{1/2}R)}{n} \|\Phi(\Delta)\|_{\mathcal{H}}.
 \end{aligned}$$

Then for

$$a = \frac{3\lambda}{n^2} \quad \text{and} \quad b = \frac{2(L^{3/2}R + L^{3/2} + \lambda L^{1/2}R)}{n},$$

we have

$$\begin{aligned}
 \|\Phi(\Delta)\|_{\mathcal{H}} &\leq \frac{b - \sqrt{b^2 - 4a(\ell_{K,\mathbf{k},\lambda}(\mathbf{v} + \Delta) - \ell_{K,\mathbf{k},\lambda}(\mathbf{v}))}}{2a} \leq \sqrt{\frac{\ell_{K,\mathbf{k},\lambda}(\mathbf{v} + \Delta) - \ell_{K,\mathbf{k},\lambda}(\mathbf{v})}{a}} \\
 &\leq n \sqrt{\frac{\ell_{K,\mathbf{k},\lambda}(\mathbf{v} + \Delta) - \ell_{K,\mathbf{k},\lambda}(\mathbf{v})}{3\lambda}} = O\left(n \sqrt{\frac{\ell_{K,\mathbf{k},\lambda}(\mathbf{v} + \Delta) - \ell_{K,\mathbf{k},\lambda}(\mathbf{v})}{\lambda}}\right)
 \end{aligned}$$

as desired.  $\square$

The lemma also holds for  $\ell_{K_{SS}, \mathbf{k}_S, \lambda}$  and  $\ell_{\mathcal{K}_{SS}, \hat{\mathbf{k}}_S, \lambda}$ .

*Proof of Theorem 3.2.* On applying Lemma 2.2 to  $K$ ,  $\mathbf{k}\mathbf{1}^\top$ , and  $\mathbf{y}\mathbf{1}^\top$ , we have

$$\|\mathcal{K} - \pi(\mathcal{K}_{SS})\|_{\square} \leq \epsilon L, \quad \|\hat{\mathbf{k}} - \pi(\hat{\mathbf{k}}_S)\|_{\square} \leq \epsilon L,$$

and

$$\|\mathbf{y} - \pi(y_S)\|_{\square} \leq \epsilon L,$$

which holds for a some measure-preserving bijection  $\pi: [0, 1] \rightarrow [0, 1]$  with a probability of at least 0.99. In what follows, we assume that this has happened.

Let  $\tilde{\mathbf{v}}^* \in \mathbb{R}^s$  be the minimizer of  $\ell_{K_{SS}, \mathbf{k}_S, \lambda}$  that is returned by Algorithm 1, and let  $\mathbf{v} \in \mathbb{R}^n$  be the vector given by Lemma C.1 on  $\tilde{\mathbf{v}}^*$ . Then, we have

$$\begin{aligned}
 \ell_{K,\mathbf{k},\lambda}(\mathbf{v}) &= \ell_{K_{SS}, \mathbf{k}_S, \lambda}(\tilde{\mathbf{v}}^*) + O(\epsilon L^2 R^2) \\
 &= \ell_{K,\mathbf{k},\lambda}(\mathbf{v}^*) + O(\epsilon L^2 R^2).
 \end{aligned}$$

This means that  $\|\Phi(\mathbf{v} - \mathbf{v}^*)\|_{\mathcal{H}} = O(\sqrt{\epsilon} L R n)$  by Lemma C.2. Let  $\pi$  be the measure-preserving bijection given by Lemma C.1. Then, we have

$$\begin{aligned}
 \tilde{\mu}_{\mathbf{x}^*} &= \frac{\langle \tilde{\mathbf{v}}, \mathbf{y}_S \rangle}{s} = \langle \tilde{\mathbf{v}}, y_S \rangle = \langle \pi(\tilde{\mathbf{v}}), \pi(y_S) \rangle = \langle \mathbf{v}, \pi(y_S) \rangle \\
 &= \langle \mathbf{v}, \mathbf{y} \rangle + \langle \mathbf{v}, \pi(y_S) - y \rangle = \frac{\langle \mathbf{v}, \mathbf{y} \rangle}{n} + \langle \mathbf{v}, \pi(y_S) - y \rangle \\
 &= \frac{\langle \mathbf{v}^*, \mathbf{y} \rangle}{n} + \frac{\langle \mathbf{v} - \mathbf{v}^*, \mathbf{y} \rangle}{n} + \langle \mathbf{v}, \pi(y_S) - y \rangle \\
 &= \mu_{\mathbf{x}^*} + \frac{\langle \Phi(\mathbf{v} - \mathbf{v}^*), \boldsymbol{\alpha} \rangle_{\mathcal{H}}}{n} + \langle \mathbf{v}, \pi(y_S) - y \rangle.
 \end{aligned} \tag{14}$$

By Cauchy-Schwarz and Lemma 2.3, we have

$$(14) = \mu_{\mathbf{x}^*} \pm \left( \frac{\|\Phi(\mathbf{v}^* - \mathbf{v})\|_{\mathcal{H}} \|\boldsymbol{\alpha}\|_{\mathcal{H}}}{n} \right)$$

$$\begin{aligned}
 & + \|\mathbf{v}\|_\infty \|(\pi(y_S) - y) \mathbf{1}^\top\|_\square \| \mathbf{1} \|_\infty) \\
 & = \mu_{\mathbf{x}^*} \pm O(\sqrt{\epsilon} L^2 R).
 \end{aligned} \tag{15}$$

Similarly, we have

$$\begin{aligned}
 \tilde{\sigma}_{\mathbf{x}^*}^2 & = k(\mathbf{x}^*, \mathbf{x}^*) - \frac{\langle \tilde{\mathbf{v}}, \mathbf{k}_S \rangle}{s} = k(\mathbf{x}^*, \mathbf{x}^*) - \frac{\langle \tilde{\mathbf{v}}, \hat{\mathbf{k}}_S \rangle}{s} \\
 & = k(\mathbf{x}^*, \mathbf{x}^*) - \langle \pi(\tilde{\mathbf{v}}), \pi(\hat{\mathbf{k}}_S) \rangle \\
 & = k(\mathbf{x}^*, \mathbf{x}^*) - \langle \mathbf{v}, \pi(\hat{\mathbf{k}}_S) \rangle \\
 & = k(\mathbf{x}^*, \mathbf{x}^*) - \langle \mathbf{v}, \hat{\mathbf{k}} \rangle - \langle \mathbf{v}, \pi(\hat{\mathbf{k}}_S) - \hat{\mathbf{k}} \rangle \\
 & = k(\mathbf{x}^*, \mathbf{x}^*) - \frac{\langle \mathbf{v}, \mathbf{k} \rangle}{n} - \langle \mathbf{v}, \pi(\hat{\mathbf{k}}_S) - \hat{\mathbf{k}} \rangle \\
 & = k(\mathbf{x}^*, \mathbf{x}^*) - \frac{\langle \mathbf{v}^*, \mathbf{k} \rangle}{n} - \frac{\langle \mathbf{v} - \mathbf{v}^*, \mathbf{k} \rangle}{n} - \langle \mathbf{v}, \pi(\hat{\mathbf{k}}_S) - \hat{\mathbf{k}} \rangle \\
 & = \sigma_{\mathbf{x}^*}^2 - \frac{\langle \Phi(\mathbf{v} - \mathbf{v}^*), \phi_{\mathbf{x}^*} \rangle_{\mathcal{H}}}{n} - \langle \mathbf{v}, \pi(\hat{\mathbf{k}}_S) - \hat{\mathbf{k}} \rangle.
 \end{aligned} \tag{16}$$

By Cauchy-Schwarz and Lemma 2.3, we have

$$\begin{aligned}
 (16) & = \sigma_{\mathbf{x}^*}^2 \pm \left( \frac{\|\Phi(\mathbf{v} - \mathbf{v}^*)\|_{\mathcal{H}} \|\phi_{\mathbf{x}^*}\|_{\mathcal{H}}}{n} \right. \\
 & \quad \left. + \|\mathbf{v}\|_\infty \|(\pi(\hat{\mathbf{k}}_S) - \hat{\mathbf{k}}) \mathbf{1}^\top\|_\square \| \mathbf{1} \|_\infty) \right) \\
 & = \sigma_{\mathbf{x}^*}^2 \pm O(\sqrt{\epsilon} L^2 R).
 \end{aligned}$$

□

## D Proofs of Section 5

### D.1 Proof of Theorem 5.1

*Proof.* We evaluate the difference between the cross-validated loss values as

$$\begin{aligned}
 & \text{CV}(\theta_1) - \text{CV}(\theta_2) \\
 & = \frac{1}{q} \sum_{i \in Q} (y_i - \hat{f}_{S, \theta_1}(\mathbf{x}_i))^2 - (y_i - \hat{f}_{S, \theta_2}(\mathbf{x}_i))^2 \\
 & = \frac{1}{q} \sum_{i \in Q} (f^*(\mathbf{x}_i) - \hat{f}_{S, \theta_1}(\mathbf{x}_i))^2 - (f^*(\mathbf{x}_i) - \hat{f}_{S, \theta_2}(\mathbf{x}_i))^2 \\
 & \quad - 2\epsilon_i (f^*(\mathbf{x}_i) - \hat{f}_{S, \theta_1}(\mathbf{x}_i)) + 2\epsilon_i (f^*(\mathbf{x}_i) - \hat{f}_{S, \theta_2}(\mathbf{x}_i)) \\
 & = \frac{1}{q} \sum_{i \in Q} (f^*(\mathbf{x}_i) - f_{S, \theta_1}^0(\mathbf{x}_i) - \omega_1(s))^2 - (f^*(\mathbf{x}_i) - f_{S, \theta_2}^0(\mathbf{x}_i) - \omega_2(s))^2 \\
 & \quad - 2\epsilon_i (f^*(\mathbf{x}_i) - f_{S, \theta_1}^0(\mathbf{x}_i) + \omega_1(s) - f^*(\mathbf{x}_i) - f_{S, \theta_2}^0(\mathbf{x}_i) - \omega_2(s)) \\
 & = \frac{1}{q} \sum_{i \in Q} (f^*(\mathbf{x}_i) - f_{S, \theta_1}^0(\mathbf{x}_i))^2 - \omega_1(s) (f^*(\mathbf{x}_i) - f_{S, \theta_1}^0(\mathbf{x}_i)) + \omega_1(s)^2 \\
 & \quad - (f^*(\mathbf{x}_i) - f_{S, \theta_2}^0(\mathbf{x}_i))^2 + \omega_2(s) (f^*(\mathbf{x}_i) - f_{S, \theta_2}^0(\mathbf{x}_i)) - \omega_2(s)^2 \\
 & \quad - 2\epsilon_i (f^*(\mathbf{x}_i) - f_{S, \theta_1}^0(\mathbf{x}_i) - f^*(\mathbf{x}_i) + f_{S, \theta_2}^0(\mathbf{x}_i)) - 2\epsilon_i (\omega_1(s) - \omega_2(s)).
 \end{aligned}$$

Here for  $\ell = 1, 2$ , by the Bernstein's inequality, we have

$$\Pr \left( \left| \frac{1}{q} \sum_{i \in Q} (f^*(\mathbf{x}_i) - f_{S, \theta_\ell}^0(\mathbf{x}_i))^2 - \text{EL}(\theta_\ell) \right| \leq t_\ell \right)$$

$$\geq 1 - 2 \exp\left(-\frac{1}{2} \frac{t_\ell^2}{B_\sigma^2/q + 2B^2 t_\ell/(3q)}\right) =: 1 - p_\ell(t_\ell, q),$$

for any  $t_\ell > 0$ . Also, the Chebyshev's inequality yields

$$\Pr\left(\left|\nu^2 - \frac{1}{q} \sum_{i \in Q} \epsilon_i^2\right| \leq t\right) \geq 1 - \frac{\nu^2}{qt} =: 1 - p_\nu(t, q),$$

for all  $t > 0$ . Then, with probability  $1 - p_1(t_1, q) - p_2(t_2, q) - p_\nu(t_3, q)$ , we obtain

$$\begin{aligned} & \text{CV}(\theta_1) - \text{CV}(\theta_2) \\ & \leq \text{EL}(\theta_1) + t_1 - \text{EL}(\theta_2) + t_2 \\ & \quad + \frac{1}{q} \sum_{i \in Q} -\omega_1(s)(f^*(\mathbf{x}_i) - f_{S, \theta_1}^0(\mathbf{x}_i)) + \omega_1(s)^2 + \omega_2(s)(f^*(\mathbf{x}_i) - f_{S, \theta_2}^0(\mathbf{x}_i)) - \omega_2(s)^2 \\ & \quad - 2\epsilon_i(f^*(\mathbf{x}_i) - f_{S, \theta_1}^0(\mathbf{x}_i) - f^*(\mathbf{x}_i) + f_{S, \theta_2}^0(\mathbf{x}_i)) - 2\epsilon_i(\omega_1(s) - \omega_2(s)) \\ & \leq -\Xi + t_1 + t_2 + 3\omega(s)^2 + 2\omega(s)B + \nu^2(4B + \omega(s)) + t_3(4B + 2\omega(s)), \end{aligned}$$

by applying the Cauchy-Schwarz inequality and  $\omega(s) = \omega_1(s) \vee \omega_2(s)$ .

Then, we can state that

$$\text{CV}(\theta_1) \leq \text{CV}(\theta_2),$$

when the following holds;

$$t_1 + t_2 + t_3(4B + 2\omega) \leq \Xi - 3\omega(s)^2 - 2\omega(s)B - \nu^2(4B + \omega) =: \tilde{\Xi}(s).$$

We set  $t_1 = t_2 = t_3(4B + 2\omega) = \tilde{\Xi}/3$  and substitute them, then we have

$$\begin{aligned} & 1 - p_1(t_1, q) - p_2(t_2, q) - p_\nu(t_3, q) \\ & = 1 - 4 \exp\left(-\frac{1}{2} \frac{t^2}{B_\sigma^2/q + B^2 t/(3q)}\right) - \frac{3\nu^2(4B + 2\omega(s))}{q\tilde{\Xi}(s)} \\ & \geq 1 - 4 \exp\left(-\frac{1}{2} \left(\frac{3qt}{B^2} - \frac{B_\sigma^2 9q}{B^4}\right)\right) - \frac{3\nu^2(4B + 2\omega(s))}{q\tilde{\Xi}(s)} \\ & = 1 - 4 \exp\left(-\frac{q}{2} \left(\frac{1}{B^2} \tilde{\Xi}(s) - \frac{9B_\sigma^2}{B^4}\right)\right) - \frac{3\nu^2(4B + 2\omega(s))}{q\tilde{\Xi}(s)}. \end{aligned}$$

Then, we obtain the result.  $\square$

## E Approximation Accuracy with Various Kernels with Other Data Sets

Figures 5–9 show the approximation errors with various kernel functions as shown in Section 6.1, with different datasets.



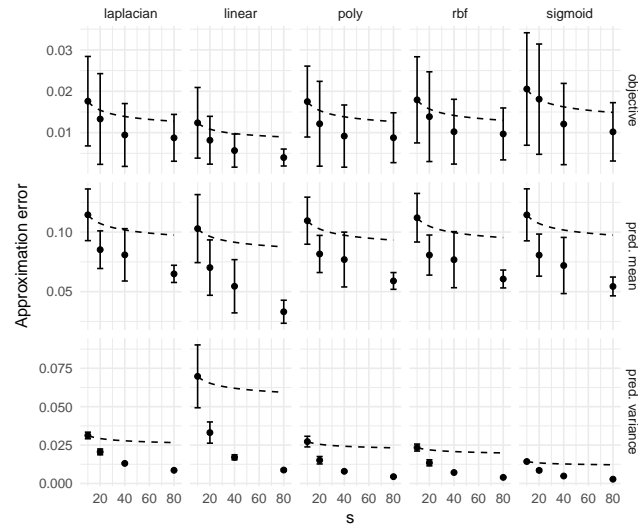

Figure 5: Approximation errors on abalone data set. The setting is the same as Section 6.1.

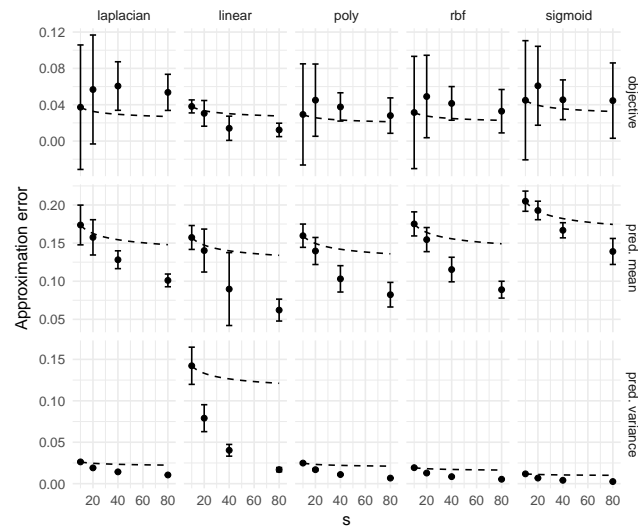

Figure 6: Approximation errors on cpusmall data set.

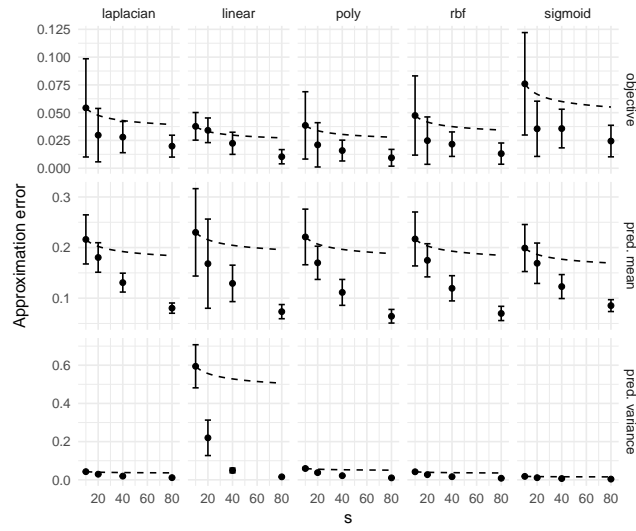

Figure 7: Approximation errors on housing data set.

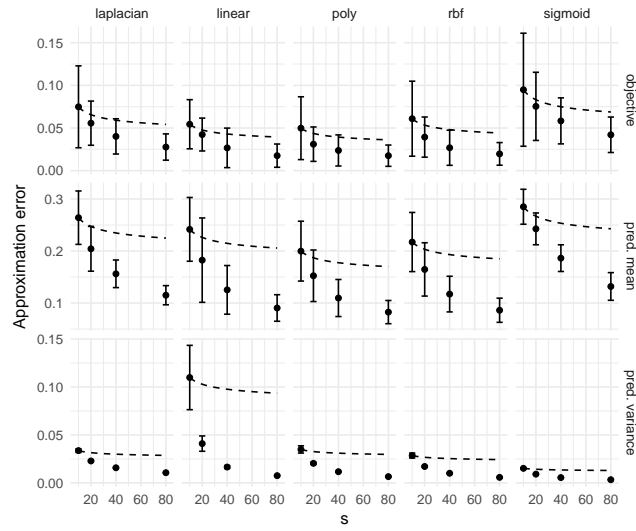

Figure 8: Approximation errors on mg data set.

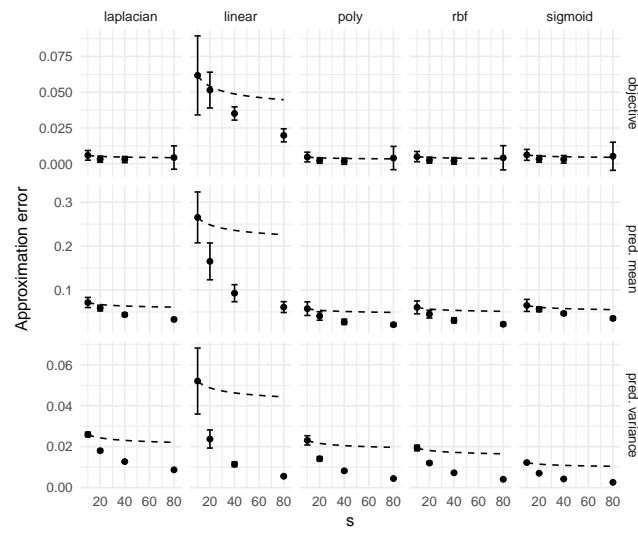

Figure 9: Approximation errors on `space_ga` data set.
